# Supplementary material for: Transcriptomic Analysis of Gonadal Adipose Tissue in Male Mice Exposed Perinatally to 2,2′,4,4′-Tetrabromodiphenyl Ether (BDE-47)
Source: PubMed Central journal article supplement (PMC6027300; doi:10.3390/toxics6020021), 2018-03-29
Supplement: toxics-06-00021-s001.pdf [file toxics-06-00021-s001.pdf]

# Supplementary Materials: Transcriptomic Analysis of Gonadal Adipose Tissue in Male Mice Exposed Perinatally to 2,2',4,4'-Tetrabromodiphenyl Ether (BDE-47)

Aser Abrha and Alexander Suvorov

**Table S1.** Significant 2-fold differentially expressed genes in gonadal adipose tissue of mice exposed perinatally to 0.2 mg/kg body weight BDE-47.

| Gene                            | Locus                     | log2 (Control FPKM) | log2 (BDE-47 FPKM) | log2 (Ratio) | q Value               |
|---------------------------------|---------------------------|---------------------|--------------------|--------------|-----------------------|
| Kif27, Mir6369                  | chr13:58287515-58354862   | -0.91               | 3.35               | 4.26         | $2.21 \times 10^{-2}$ |
| Mir3061                         | chr11:52123633-52127767   | -0.08               | 3.66               | 3.73         | $1.30 \times 10^{-2}$ |
| A330023F24Rik, Mir29b-2, Mir29c | chr1:195017157-195039001  | 1.51                | 4.66               | 3.15         | $1.30 \times 10^{-2}$ |
| Actg2                           | chr6:83512908-83536251    | 0.63                | 3.76               | 3.12         | $1.30 \times 10^{-2}$ |
| Mir17hg, Mir19b-1               | chr14:115044304-115046851 | 0.54                | 2.85               | 2.3          | $4.75 \times 10^{-2}$ |
| Cish                            | chr9:107296688-107301961  | 1.12                | 3.25               | 2.13         | $1.30 \times 10^{-2}$ |
| Sfrp2                           | chr3:83766320-83774314    | 2.38                | 4.48               | 2.1          | $1.30 \times 10^{-2}$ |
| Epc1, Mir1893                   | chr18:6435950-6516108     | 3.12                | 4.64               | 1.52         | $1.30 \times 10^{-2}$ |
| Grem2                           | chr1:174833784-174921819  | 1.78                | 3.29               | 1.51         | $1.30 \times 10^{-2}$ |
| Mir5122, Slc9a1                 | chr4:133369771-133423698  | 3.48                | 4.84               | 1.36         | $1.30 \times 10^{-2}$ |
| Axin2                           | chr11:108920348-108950785 | 2.8                 | 4.09               | 1.29         | $1.30 \times 10^{-2}$ |
| Myh11                           | chr16:14194364-14291408   | 3.9                 | 5.18               | 1.28         | $1.30 \times 10^{-2}$ |
| Tpm2                            | chr4:43513725-43523554    | 4.27                | 5.31               | 1.04         | $1.30 \times 10^{-2}$ |
| Mpeg1, Pfpl                     | chr19:12427904-12465285   | 5.76                | 4.7                | -1.06        | $1.30 \times 10^{-2}$ |
| Cadm1                           | chr9:47530351-47853385    | 3.02                | 1.91               | -1.11        | $3.19 \times 10^{-2}$ |
| Ctsk                            | chr3:95499209-95509387    | 4.65                | 3.52               | -1.13        | $1.30 \times 10^{-2}$ |
| Nceh1                           | chr3:27183003-27244911    | 3.33                | 2.2                | -1.14        | $1.30 \times 10^{-2}$ |
| Apba3, Mir3057                  | chr10:81267855-81291581   | 4.83                | 3.67               | -1.16        | $1.30 \times 10^{-2}$ |
| Mmp12                           | chr9:7347373-7360461      | 6.58                | 5.42               | -1.16        | $1.30 \times 10^{-2}$ |
| Ccl9                            | chr11:83572916-83578636   | 5.58                | 4.4                | -1.18        | $1.30 \times 10^{-2}$ |
| Trpv2                           | chr11:62574485-62600467   | 5.07                | 3.85               | -1.23        | $1.30 \times 10^{-2}$ |
| Ccl6                            | chr11:83582060-83623693   | 7.45                | 6.21               | -1.24        | $1.30 \times 10^{-2}$ |

|                 |                           |      |      |       |                       |
|-----------------|---------------------------|------|------|-------|-----------------------|
| Cd300lb         | chr11:114922778-114934386 | 4.04 | 2.8  | -1.24 | $4.75 \times 10^{-2}$ |
| Atf3            | chr1:191170296-191183333  | 4.5  | 3.23 | -1.28 | $1.30 \times 10^{-2}$ |
| Arhgap25        | chr6:87458544-87533259    | 4.09 | 2.81 | -1.28 | $2.21 \times 10^{-2}$ |
| Ubd             | chr17:37193891-37196101   | 6.15 | 4.87 | -1.28 | $4.75 \times 10^{-2}$ |
| Blnk            | chr19:40928926-40994535   | 3.78 | 2.48 | -1.3  | $4.07 \times 10^{-2}$ |
| Bok             | chr1:93685693-93695762    | 4.78 | 3.44 | -1.34 | $2.21 \times 10^{-2}$ |
| Cd300a          | chr11:114890040-114906474 | 3.2  | 1.84 | -1.36 | $1.30 \times 10^{-2}$ |
| Cd52            | chr4:134093537-134095073  | 6.59 | 5.23 | -1.36 | $1.30 \times 10^{-2}$ |
| Lgals3          | chr14:47373859-47386167   | 8.2  | 6.83 | -1.37 | $1.30 \times 10^{-2}$ |
| Thbs1           | chr2:118111838-118127139  | 7.4  | 5.98 | -1.41 | $1.30 \times 10^{-2}$ |
| Specc1          | chr11:61956762-62223013   | 2.8  | 1.35 | -1.44 | $1.30 \times 10^{-2}$ |
| Atp6v0d2        | chr4:19876837-19922566    | 4.84 | 3.36 | -1.48 | $1.30 \times 10^{-2}$ |
| C5ar1           | chr7:16246742-16259540    | 4.54 | 3.05 | -1.49 | $1.30 \times 10^{-2}$ |
| Lcn2            | chr2:32384636-32387739    | 5.85 | 4.31 | -1.54 | $1.30 \times 10^{-2}$ |
| Hmgcs2          | chr3:98280430-98310738    | 5.12 | 3.58 | -1.54 | $1.30 \times 10^{-2}$ |
| Rnf128          | chrX:139563339-139673145  | 3.29 | 1.63 | -1.67 | $2.21 \times 10^{-2}$ |
| Mt2             | chr8:94172617-94173567    | 9.84 | 8.12 | -1.71 | $1.30 \times 10^{-2}$ |
| Slc38a3         | chr9:107651154-107668968  | 3.49 | 1.78 | -1.71 | $1.30 \times 10^{-2}$ |
| Ass1            | chr2:31470269-31520670    | 4.33 | 2.5  | -1.83 | $1.30 \times 10^{-2}$ |
| Mir6537, Pou2f2 | chr7:25090634-25132462    | 2.71 | 0.65 | -2.06 | $1.30 \times 10^{-2}$ |
| Acta1           | chr8:123891757-123894775  | 6.91 | 4.84 | -2.07 | $1.30 \times 10^{-2}$ |
| Itih4           | chr14:30886475-30901986   | 2.33 | 0.07 | -2.27 | $1.30 \times 10^{-2}$ |
| Itih3           | chr14:30908573-30923587   | 1.9  | -0.4 | -2.3  | $1.30 \times 10^{-2}$ |
| Cuzd1           | chr7:131308553-131322292  | 3.96 | 1.52 | -2.44 | $1.30 \times 10^{-2}$ |
| Spp1            | chr5:104435110-104441053  | 4.65 | 2.14 | -2.51 | $1.30 \times 10^{-2}$ |
| Prom2           | chr2:127526952-127541417  | 1.92 | -0.6 | -2.52 | $1.30 \times 10^{-2}$ |
| Ttr             | chr18:20665249-20674326   | 4.93 | 2.27 | -2.66 | $1.30 \times 10^{-2}$ |
| Hpd             | chr5:123171806-123182686  | 3.06 | 0.35 | -2.71 | $2.21 \times 10^{-2}$ |
| Apoh            | chr11:108395296-108414396 | 3.46 | 0.68 | -2.79 | $1.30 \times 10^{-2}$ |
| Gnmt            | chr17:46725663-46729165   | 3.28 | 0.45 | -2.83 | $1.30 \times 10^{-2}$ |

|                   |                           |      |       |       |                       |
|-------------------|---------------------------|------|-------|-------|-----------------------|
| Hpx               | chr7:105591610-105600116  | 4.13 | 1.25  | -2.88 | $1.30 \times 10^{-2}$ |
| Fabp1             | chr6:71199887-71205023    | 6.41 | 3.49  | -2.93 | $1.30 \times 10^{-2}$ |
| Mug1, Mug2        | chr6:121781824-122085967  | 2.92 | -0.08 | -3    | $2.21 \times 10^{-2}$ |
| Cyp2c29, Cyp2c39  | chr19:39287084-39568529   | 2.85 | -0.29 | -3.14 | $1.30 \times 10^{-2}$ |
| Cyp2c70           | chr19:40153360-40187286   | 2.9  | -0.35 | -3.24 | $1.30 \times 10^{-2}$ |
| Itih2             | chr2:10094590-10130683    | 1.93 | -1.37 | -3.3  | $1.30 \times 10^{-2}$ |
| Apoa1             | chr9:46228629-46230469    | 6.07 | 2.63  | -3.44 | $1.30 \times 10^{-2}$ |
| Arg1              | chr10:24915206-24927470   | 2.95 | -0.51 | -3.46 | $1.30 \times 10^{-2}$ |
| Kng1              | chr16:23058299-23082078   | 2.93 | -0.55 | -3.48 | $1.30 \times 10^{-2}$ |
| Aldob             | chr4:49535994-49549483    | 3.72 | 0.23  | -3.49 | $1.30 \times 10^{-2}$ |
| Ambp              | chr4:63143278-63154142    | 3.8  | 0.31  | -3.49 | $1.30 \times 10^{-2}$ |
| Pah               | chr10:87521794-87584137   | 1.65 | -1.88 | -3.53 | $1.30 \times 10^{-2}$ |
| Slco1b2           | chr6:141629517-141686635  | 1.24 | -2.35 | -3.59 | $4.75 \times 10^{-2}$ |
| Rdh7              | chr10:127884026-127888733 | 2.05 | -1.58 | -3.63 | $1.30 \times 10^{-2}$ |
| Apof              | chr10:128267996-128270151 | 1.7  | -1.94 | -3.64 | $4.75 \times 10^{-2}$ |
| Gc                | chr5:89417510-89457898    | 4.75 | 1.08  | -3.67 | $1.30 \times 10^{-2}$ |
| Itih1             | chr14:30929179-30943289   | 1    | -2.71 | -3.71 | $3.19 \times 10^{-2}$ |
| Azgp1             | chr5:137981520-137990232  | 2.32 | -1.41 | -3.73 | $4.75 \times 10^{-2}$ |
| Akr1c6            | chr13:4434342-4457530     | 2.87 | -0.87 | -3.74 | $4.75 \times 10^{-2}$ |
| Bhmt              | chr13:93616890-93637758   | 3.96 | 0.17  | -3.79 | $1.30 \times 10^{-2}$ |
| Alb               | chr5:90460888-90476603    | 8.5  | 4.62  | -3.88 | $1.30 \times 10^{-2}$ |
| Cyp3a11, Cyp3a41a | chr5:145694048-145879854  | 4.16 | 0.27  | -3.89 | $1.30 \times 10^{-2}$ |
| Pzp               | chr6:128438756-128526720  | 2.79 | -1.11 | -3.9  | $1.30 \times 10^{-2}$ |
| Plg               | chr17:12378608-12419384   | 3.05 | -0.87 | -3.92 | $1.30 \times 10^{-2}$ |
| Rgn               | chrX:20549817-20562087    | 2.67 | -1.29 | -3.96 | $1.30 \times 10^{-2}$ |
| Fgg               | chr3:83007895-83015049    | 4.71 | 0.74  | -3.97 | $1.30 \times 10^{-2}$ |
| Fgb               | chr3:83042304-83049790    | 4.87 | 0.88  | -3.99 | $1.30 \times 10^{-2}$ |
| F2                | chr2:91625319-91636457    | 2.86 | -1.16 | -4.02 | $1.30 \times 10^{-2}$ |
| Gjb1              | chrX:101376375-101385629  | 1.99 | -2.12 | -4.11 | $4.07 \times 10^{-2}$ |
| Apob              | chr12:7977676-8016839     | 1.88 | -2.46 | -4.34 | $1.30 \times 10^{-2}$ |

---

|                 |                           |      |       |        |                       |
|-----------------|---------------------------|------|-------|--------|-----------------------|
| Dio3os, Mir1247 | chr12:110275384-110278656 | 4.86 | 0.42  | -4.43  | $1.30 \times 10^{-2}$ |
| Fga             | chr3:83026152-83033617    | 4.17 | -0.42 | -4.59  | $1.30 \times 10^{-2}$ |
| Cps1            | chr1:67123026-67231267    | 2.66 | -1.94 | -4.6   | $1.30 \times 10^{-2}$ |
| Mat1a           | chr14:41105032-41124428   | 2.96 | -1.67 | -4.62  | $1.30 \times 10^{-2}$ |
| Spint4          | chr2:164698500-164702448  | 0.01 | -10   | -10.01 | $2.21 \times 10^{-2}$ |
| Defb43          | chr14:63011770-63018088   | 0.35 | -10   | -10.35 | $1.30 \times 10^{-2}$ |
| Bsph2           | chr7:13554865-13571067    | 0.43 | -10   | -10.43 | $1.30 \times 10^{-2}$ |
| Rnase12         | chr14:51056697-51057242   | 0.84 | -10   | -10.84 | $1.30 \times 10^{-2}$ |
| Defb37          | chr8:18986232-18991055    | 1.5  | -10   | -11.5  | $1.30 \times 10^{-2}$ |
| AY761185        | chr8:20943693-20944748    | 2.11 | -10   | -12.11 | $1.30 \times 10^{-2}$ |
| Defb28          | chr2:152518254-152521447  | 3.29 | -10   | -13.29 | $1.30 \times 10^{-2}$ |
| Defb38          | chr8:19023463-19026529    | 3.44 | -10   | -13.44 | $2.21 \times 10^{-2}$ |

**Table S2.** GSEA analysis: summary of top enriched gene sets in the gonadal adipose tissue of mice exposed perinatally to 0.2 mg/kg body weight BDE-47.

| NAME                                          | SIZE | Enrichment score | Normalised enrichment score | NOM <i>p</i> -val | FDR <i>q</i> -val | FWER <i>p</i> -val | RANK AT MAX |
|-----------------------------------------------|------|------------------|-----------------------------|-------------------|-------------------|--------------------|-------------|
| HALLMARK_COAGULATION                          | 108  | -0.7925364       | -1.7812736                  | 0                 | 0.004101          | 0.004              | 582         |
| HALLMARK_XENOBIOTIC_METABOLISM                | 167  | -0.72691166      | -1.6750236                  | 0                 | 0.027806          | 0.055              | 446         |
| HALLMARK_BILE_ACID_METABOLISM                 | 87   | -0.72079074      | -1.5710769                  | 0.0035714         | 0.098446          | 0.256              | 366         |
| HALLMARK_COMPLEMENT                           | 143  | -0.60537505      | -1.3765348                  | 0.0503433         | 0.676869          | 0.942              | 2331        |
| REACTOME_SMOOTH_MUSCLE_CONTRACTION            | 20   | 0.75713444       | 1.90847                     | 0.06639           | 1                 | 1                  | 253         |
| MEINHOLD_OVARIAN_CANCER_LOW_GRADE_UP          | 16   | 0.7323402        | 1.7202928                   | 0.1065292         | 1                 | 1                  | 31          |
| HORTON_SREBF_TARGETS                          | 20   | 0.7254165        | 1.7181175                   | 0.092511          | 1                 | 1                  | 1471        |
| REACTOME_MUSCLE_CONTRACTION                   | 30   | 0.6751347        | 1.6108487                   | 0.1088083         | 1                 | 1                  | 456         |
| NADLER_OBESITY_DN                             | 44   | 0.66954297       | 1.5260774                   | 0.0617284         | 1                 | 1                  | 1884        |
| REACTOME_CHOLESTEROL_BIOSYNTHESIS             | 18   | 0.64574134       | 1.5223196                   | 0.1439114         | 1                 | 1                  | 1672        |
| HSIAO_LIVER_SPECIFIC_GENES                    | 172  | -0.883853        | -2.028348                   | 0                 | 0                 | 0                  | 488         |
| CAIRO_LIVER_DEVELOPMENT_DN                    | 172  | -0.8234503       | -1.926647                   | 0                 | 0                 | 0                  | 673         |
| SU_LIVER                                      | 38   | -0.92811877      | -1.9205562                  | 0                 | 0                 | 0                  | 429         |
| CHIANG_LIVER_CANCER_SUBCLASS_PROLIFERATION_DN | 129  | -0.8457685       | -1.8965874                  | 0                 | 0.00178           | 0.007              | 429         |
| OHGUCHI_LIVER_HNF4A_TARGETS_DN                | 82   | -0.8383536       | -1.8692034                  | 0                 | 0.005103          | 0.025              | 968         |
| YAMASHITA_LIVER_CANCER_STEM_CELL_DN           | 49   | -0.8607048       | -1.8556718                  | 0                 | 0.008842          | 0.051              | 404         |

|                                                    |     |             |            |           |          |       |     |
|----------------------------------------------------|-----|-------------|------------|-----------|----------|-------|-----|
| KEGG_COMPLEMENT_AND_COAGULATION_CASCADES           | 47  | -0.85020536 | -1.8207873 | 0         | 0.036708 | 0.23  | 480 |
| LEE_LIVER_CANCER_SURVIVAL_UP                       | 118 | -0.80631876 | -1.8192244 | 0         | 0.034545 | 0.243 | 446 |
| HOSHIDA_LIVER_CANCER_SUBCLASS_S3                   | 209 | -0.77290404 | -1.80562   | 0         | 0.056649 | 0.399 | 643 |
| BIOCARTA_INTRINSIC_PATHWAY                         | 20  | -0.89908606 | -1.8001451 | 0.0026631 | 0.063124 | 0.471 | 446 |
| REACTOME_FORMATION_OF_FIBRIN_CLOT_CLOTTING_CASCADE | 22  | -0.8958861  | -1.7939211 | 0         | 0.070832 | 0.548 | 480 |
| KONDO_PROSTATE_CANCER_WITH_H3K27ME3                | 47  | -0.8267031  | -1.7826784 | 0.0011792 | 0.092976 | 0.673 | 682 |
| SERVITJA_ISLET_HNF1A_TARGETS_DN                    | 64  | -0.82448655 | -1.7759959 | 0         | 0.107639 | 0.758 | 673 |
| LEE_LIVER_CANCER_CIPROFIBRATE_DN                   | 34  | -0.84275985 | -1.7544557 | 0.004908  | 0.191406 | 0.924 | 550 |
| LEE_LIVER_CANCER                                   | 30  | -0.86145705 | -1.7486897 | 0.0012821 | 0.208157 | 0.948 | 397 |
| GO_BLOOD_MICROPARTICLE                             | 71  | -0.8602677  | -1.8951263 | 0         | 0.010074 | 0.01  | 272 |
| GO_ACUTE_PHASE_RESPONSE                            | 24  | -0.8971937  | -1.8471518 | 0         | 0.05451  | 0.101 | 335 |
| GO_SERINE_TYPE_ENDOPEPTIDASE_INHIBITOR_ACTIVITY    | 46  | -0.8429749  | -1.8244396 | 0         | 0.105001 | 0.264 | 242 |
| GO_LIPOPROTEIN_PARTICLE_RECEPTOR_BINDING           | 16  | -0.9261174  | -1.814157  | 0         | 0.115658 | 0.371 | 272 |
| GO_POSITIVE_REGULATION_OF_COAGULATION              | 24  | -0.88361436 | -1.8138926 | 0.001297  | 0.092931 | 0.373 | 480 |
| GO_ACUTE_INFLAMMATORY_RESPONSE                     | 41  | -0.8442391  | -1.8065432 | 0         | 0.104209 | 0.467 | 457 |
| GO_REGULATION_OF_COAGULATION                       | 74  | -0.8127593  | -1.785235  | 0         | 0.188057 | 0.728 | 786 |
| GO_BLOOD_COAGULATION_FIBRIN_CLOT_FORMATION         | 18  | -0.9093529  | -1.7776664 | 0         | 0.210428 | 0.81  | 480 |
| GO_NEGATIVE_REGULATION_OF_COAGULATION              | 42  | -0.84488016 | -1.7738291 | 0.0012438 | 0.211958 | 0.848 | 233 |
